# Supplementary material for: Development and rescue of human familial hypercholesterolaemia in a xenograft mouse model
Source: PubMed Central journal article supplement (PMC4557302; doi:10.1038/ncomms8339), 2015-06-17
Supplement: ncomms8339-s1.pdf [file ncomms8339-s1.pdf]

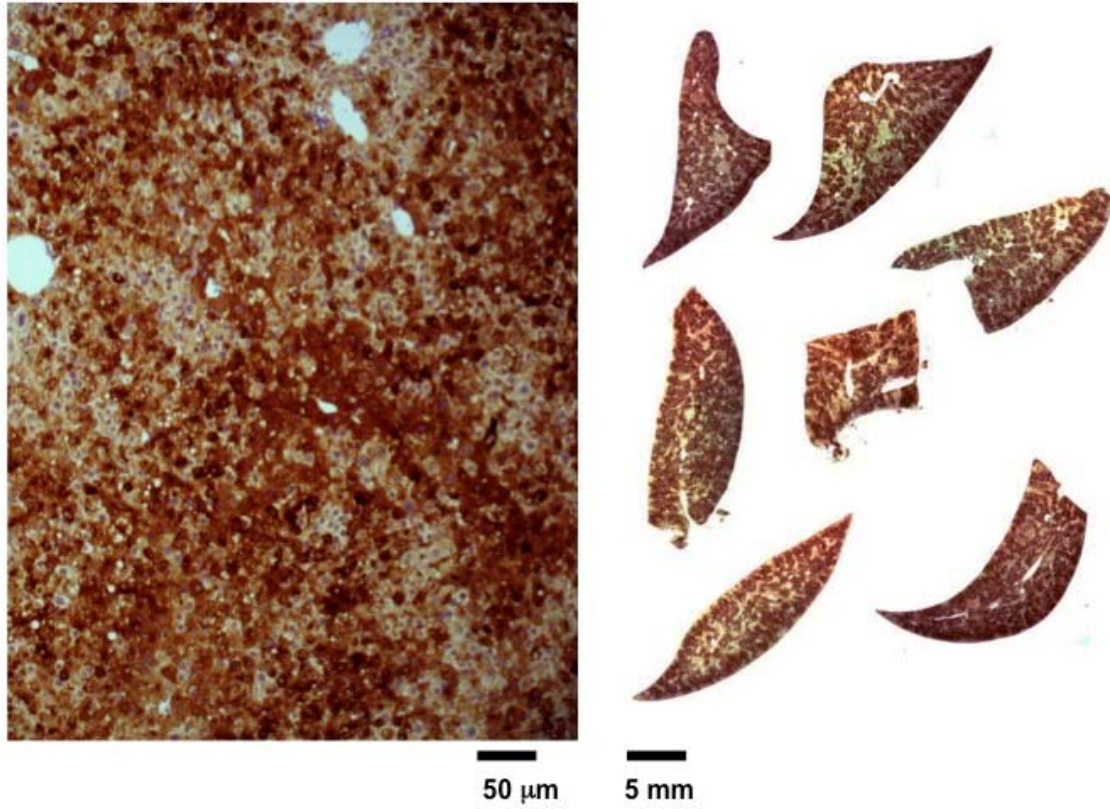

**Supplementary Figure 1. High human chimerism in FRG mice repopulated with human FH hepatocytes.** Representative immunostaining for human specific transthyretin shown in high (left) and low (right) magnification. The latter is a composed picture across multiple liver lobes of the same animal.

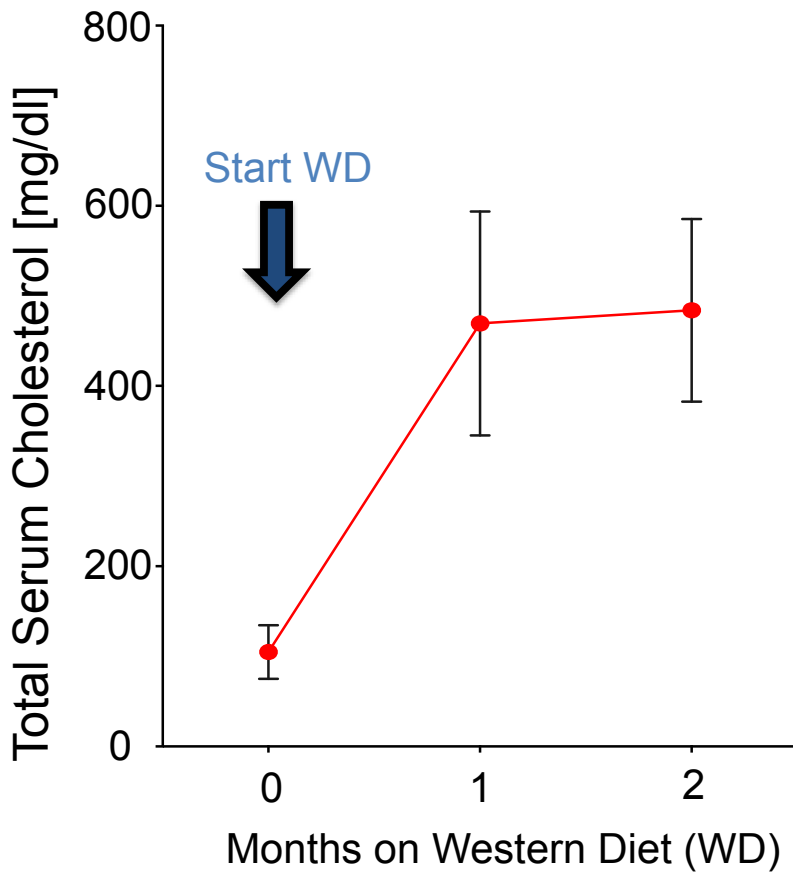

**Supplementary Figure 2. Total Serum Cholesterol levels stabilize after 1 month on Western Diet (WD).** FH chimeric mice (n=6) were put on Western Diet and bled for analysis of total serum cholesterol levels. Mean  $\pm$ SEM are shown in graph.

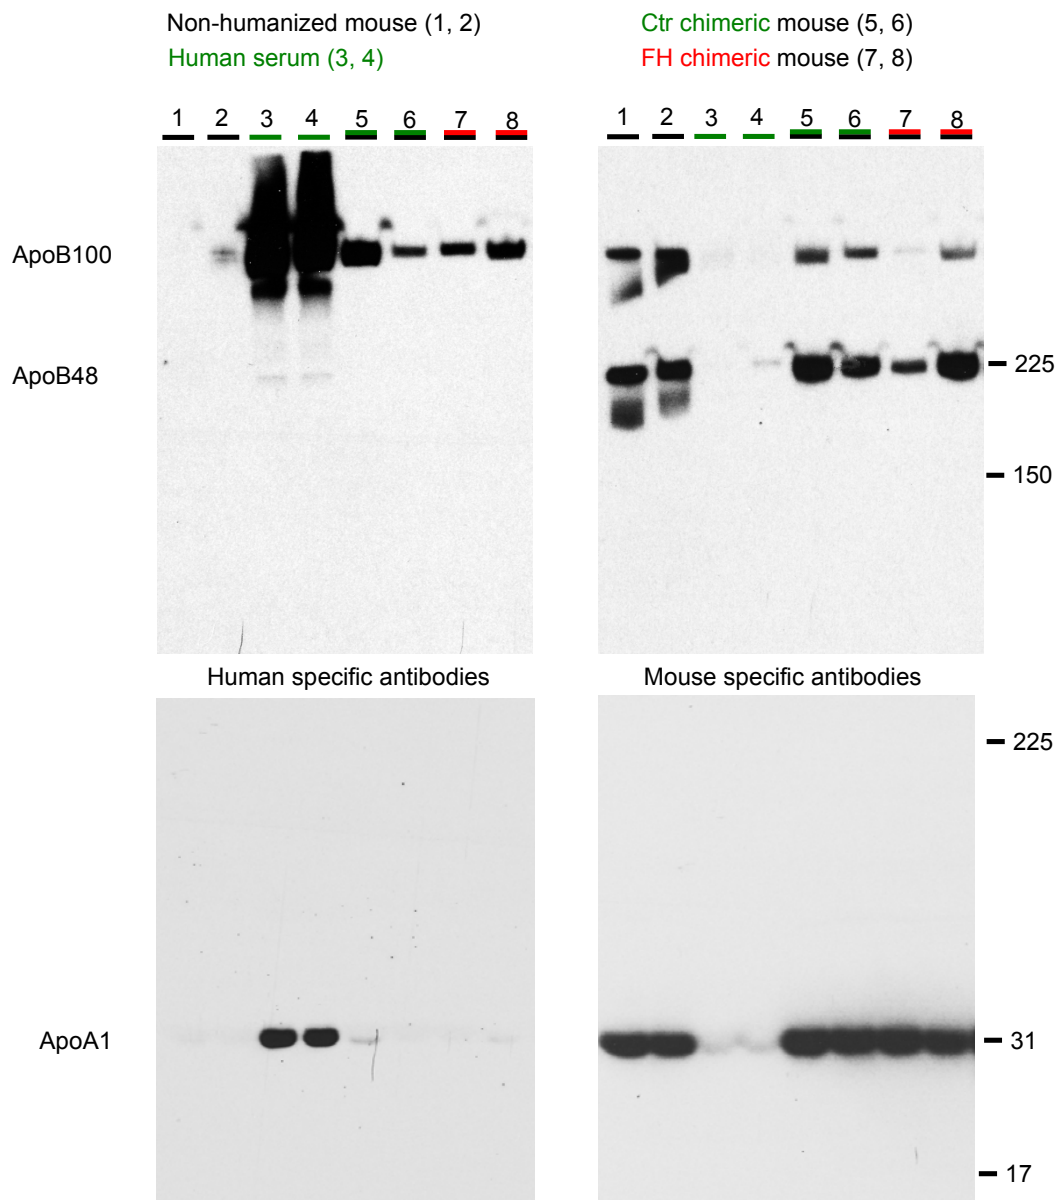

**Supplementary Figure 3. Detection of mouse and human apolipoproteins in the plasma of human liver chimeric mice.** Fasted plasma samples (as indicated) were used for Western blotting to detect human APOB (left panel) and murine ApoB (right panel). The same samples with identical amount of plasma were loaded for Western blotting using a human specific APOA1 (left) and a mouse specific ApoA1 (right) antibody. Note that human ApoB48 can not be detected in humanized mice and that APOA1 produced from human hepatocytes is difficult to detect.

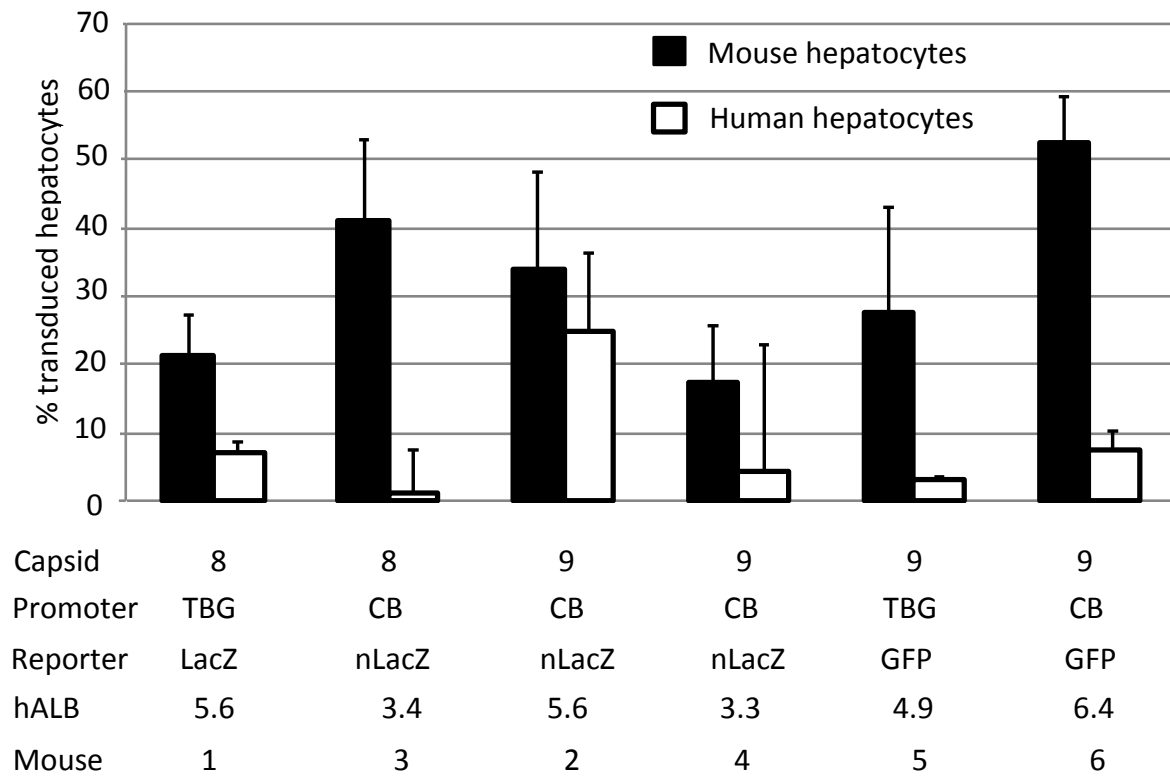

**Supplementary Figure 4. Quantification of AAV serotype transduction efficiencies in Ctr chimeric mice.** Transduction of hepatocytes by intravenous tail vein injection of one (mouse #3-6) or two (mouse#1 and #2) AAV serotypes ( $3 \times 10^{11}$  GC each). Different expression cassettes were used as depict. Quantification was done by counting LacZ- or GFP- positive human (white columns) and mouse (black columns) hepatocytes. Data shown is mean + standard deviation of 5-11 sets of images for each chimeric mouse liver . Human albumin levels (hALB) of each transduced mouse is given in mg/ml. TBG; thyroxin-binding globulin promoter, CB; CMV-enhanced chicken  $\beta$ -actin promoter.

**a**

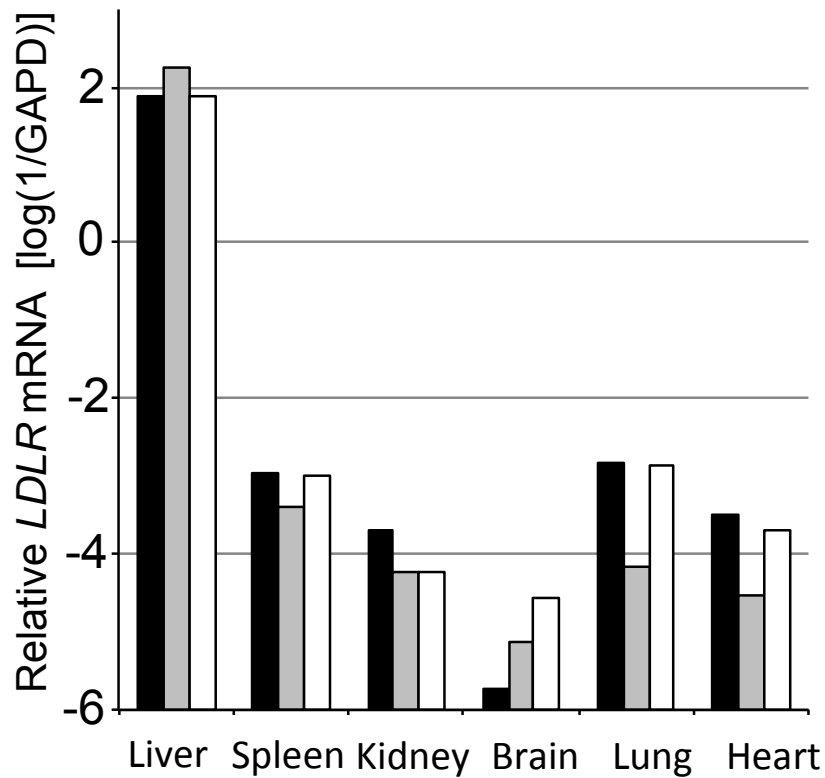

**b**

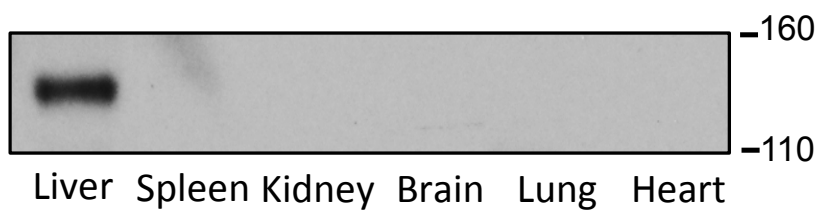

**Supplementary Figure 5. Expression of LDLR in extrahepatic organs.** (a), qRT-PCR for *hLDLR* mRNA of three AAV9-*LDLR* treated FH chimeric mice and (b), Western blotting with hLDLR antibodies using spleen, kidney, brain, lung, heart and liver (control) homogenate from a representative AAV9-*LDLR* treated FH chimeric mouse.

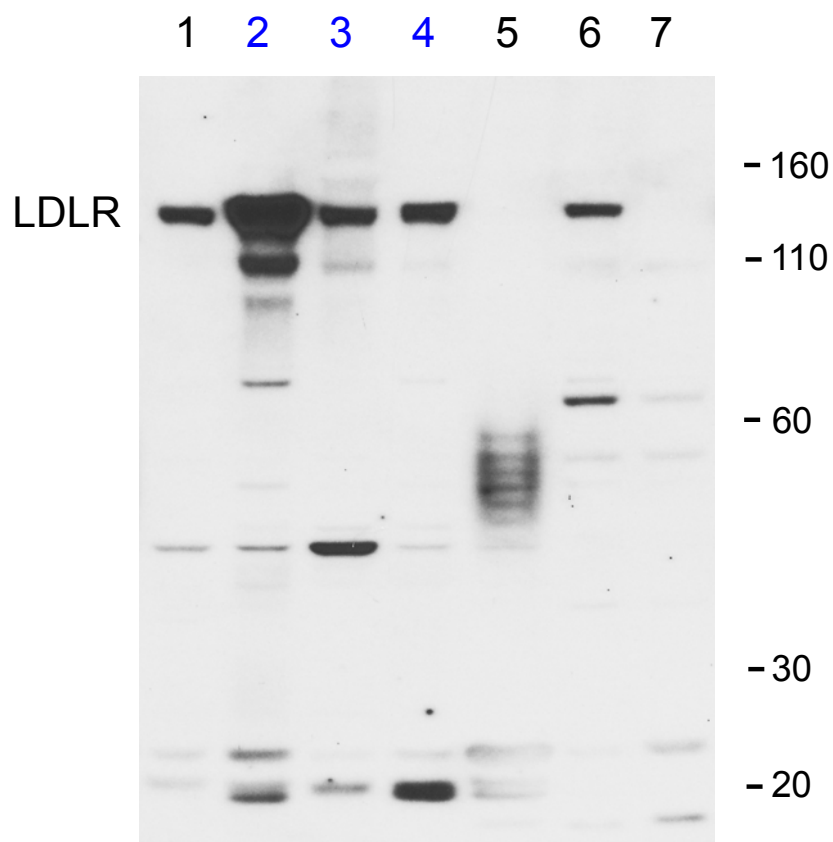

1. Ctr Heps → mouse
2. FH Heps → mouse AAV9-LDLR
3. FH Heps → mouse AAV9-LDLR
4. FH Heps → mouse AAV9-LDLR
5. FH Heps → mouse
6. Human Ctr Liver
7. Human FH Liver

**Supplementary Figure 6. Expression of LDLR in liver homogenate of treated FH chimeric animals.** Western blot reveals human LDLR in treated FH chimeric mice (blue) and control groups, demonstrating rescue of genetic defect underlying FH.

| <b>Date (age/event)</b>                       | <b>Total Cholesterol</b><br>(normal: 135-200 mg/dL) | <b>LDL Cholesterol</b><br>(normal 60-140 mg/dL) | <b>HDL Cholesterol</b><br>(normal 35-73 mg/dL) | <b>Triglycerides</b><br>(normal: 20-150 mg/dL) | <b>Lipid-lowering medication</b> |
|-----------------------------------------------|-----------------------------------------------------|-------------------------------------------------|------------------------------------------------|------------------------------------------------|----------------------------------|
| 5/2008<br>( 3 years / diagnosis)              | 921                                                 | >350                                            | 32                                             | 152                                            | none                             |
| 7/2008                                        | 850                                                 | 790                                             | 32                                             | 140                                            | atorvastatin                     |
| 9/2008                                        | 858                                                 | >350                                            | 35                                             | 128                                            |                                  |
| 12/2008                                       | 831                                                 | >350                                            | 26                                             | 115                                            |                                  |
| 5/2009                                        | 954                                                 | >350                                            | 32                                             | 140                                            | atorvastatin<br>+ ezetimibe      |
| 7/2010                                        | 924                                                 | 863                                             | 37                                             | 121                                            |                                  |
| 5/2011                                        | >1000                                               | >350                                            | 32                                             | 90                                             |                                  |
| 10/2011                                       | 820                                                 | >350                                            | 29                                             | 75                                             |                                  |
| 8/2012                                        | 826                                                 | 776                                             | 34                                             | 82                                             |                                  |
| 11/2012*<br>(7.5 years old / transplantation) | 919                                                 | 866                                             | 32                                             | 104                                            |                                  |
| 11/12/2012                                    | 460                                                 | 397                                             | 35                                             | 139                                            | atorvastatin                     |
| 12/2012                                       | 319                                                 | 240                                             | 57                                             | 110                                            |                                  |
| 3/2013                                        | 138                                                 | 64                                              | 38                                             | 184                                            |                                  |
| 10/2013                                       | 143                                                 | 66                                              | 53                                             | 123                                            |                                  |

**Supplementary Table 1: Plasma lipid analysis and medication of patient with familial**

**hypercholesterolemia.** The first lipid analysis was performed shortly before diagnosis since the FH patient presented with xanthomas under her eye for several months (05/2008). Patient was put on lipid lowering medications as indicated, but plasma lipid profile remained pathological.

\*Indicates the time when the girl had liver transplantation.

| Nucleotide   | Zygoty | Amino Acid  | Location                                                                                                                           | PolyPhen Prediction | Relationship to FH         | References                                                                                                                                                             | Notes                                                                                                             |
|--------------|--------|-------------|------------------------------------------------------------------------------------------------------------------------------------|---------------------|----------------------------|------------------------------------------------------------------------------------------------------------------------------------------------------------------------|-------------------------------------------------------------------------------------------------------------------|
| c.401G>A     | Het    | p.Cys134Tyr | LDL Receptor Class A domain 3<br>Cys134 predicted to form disulfide bond with Cys116                                               | Probably Damaging   | Dominant, likely causative | Bertolini S. et al. <sup>1</sup>                                                                                                                                       | p.Cys134Trp and pCys134Phe variants reported                                                                      |
| c.1060+10G>C | Het    | NA          | Intronic                                                                                                                           | N/A; silent         | Possibly associated        | Amsellem S. et al. <sup>2</sup><br>Dedoussis G.V. et al. <sup>3</sup><br>Sozen M.M. et al. <sup>4</sup>                                                                | Not predicted to alter splicing                                                                                   |
| c.1103G>A    | Het    | p.Cys368Tyr | EGF-like Calcium binding domain 2<br>Cys368 predicted to form disulfide bond with Cys358                                           | Probably Damaging   | Dominant, likely causative | Loux N. et al. <sup>5</sup><br>Moza P. et al. <sup>6</sup><br>Robles-Osorio L. et al. <sup>7</sup><br>Sozen M.M. et al. <sup>4</sup><br>Couture P. et al. <sup>8</sup> | Same variant<br>Same variant<br>Same variant<br>p.Cys368Gly variant reported<br>p.Cys368Arg variant reported      |
| c.1413A>G    | Het    | p.Arg471Arg | LDL Receptor class B domain 2                                                                                                      | N/A; silent         | Not associated             | Tatishcheva Iu A. et al. <sup>9</sup>                                                                                                                                  |                                                                                                                   |
| c.1773C>T    | Het    | p.Asn591Asn | LDL receptor class B domain 5<br>Silent mutation in Beta Propellor Region, alters splicing, mRNA stability and translation of LDLR | N/A; silent         | Associated with LDL-C      | Gao F. et al. <sup>10</sup><br>Teslovich T.M. et al. <sup>11</sup><br>Boright A.P. et al. <sup>12</sup>                                                                | rs688, common variant with MAF of 0.28<br>Associated with LDL-C in GWAS<br>4-10% increase depending on population |
| c.2232A>G    | Het    | p.Arg744Arg | Region with clustered O-linked oligosaccharides                                                                                    | N/A; silent         | Not associated             | Al-Khateeb A. et al. <sup>13</sup>                                                                                                                                     |                                                                                                                   |

**Supplementary Table 2. Genetic analysis of *LDLR* locus.**



| Fraction | Accession    | Coverage (%) | #Peptides | #Unique | Description                                                          |
|----------|--------------|--------------|-----------|---------|----------------------------------------------------------------------|
| HDL      | gi 114003    | 64           | 38        | 5       | RecName: Full=Apolipoprotein A-II [Mus musculus]                     |
| HDL      | gi 119573006 | 78           | 5         | 1       | <b>apolipoprotein A-II isoform CRA_c [Homo sapiens]</b>              |
| HDL      | gi 12836446  | 5            | 3         | 3       | unnamed protein product [Mus musculus]                               |
| HDL      | gi 148694829 | 4            | 6         | 4       | mCG142248 [Mus musculus]                                             |
| HDL      | gi 148706296 | 2            | 3         | 3       | complement component 3_ isoform CRA_c [Mus musculus]                 |
| HDL      | gi 157951676 | 84           | 57        | 10      | apolipoprotein A-II precursor [Mus musculus]                         |
| HDL      | gi 160333304 | 54           | 20        | 3       | apolipoprotein A-I preproprotein [Mus musculus]g                     |
| HDL      | gi 163310958 | 7            | 2         | 2       | Chain A_ Structure Of Antiplasmin                                    |
| HDL      | gi 178775    | 10           | 2         | 1       | <b>proapolipoprotein_ partial; ApoA-I [Homo sapiens]</b>             |
| HDL      | gi 18252782  | 5            | 2         | 2       | antithrombin-III precursor [Mus musculus]                            |
| HDL      | gi 186972736 | 61           | 5         | 5       | <b>Chain A_ Structure And Dynamics Of Human Apolipoprotein C-Iii</b> |
| HDL      | gi 191885    | 12           | 7         | 7       | apolipoprotein A-IV [Mus musculus]                                   |
| HDL      | gi 199618    | 3            | 4         | 2       | sex-limited protein [Mus musculus]                                   |
| HDL      | gi 199889    | 4            | 4         | 2       | unnamed protein product [Mus musculus]                               |
| HDL      | gi 2326168   | 1            | 2         | 2       | type VII collagen [Mus musculus]                                     |
| HDL      | gi 26341396  | 7            | 4         | 4       | unnamed protein product [Mus musculus]                               |
| HDL      | gi 31982171  | 9            | 9         | 7       | murinoglobulin-1 precursor [Mus musculus]                            |
| HDL      | gi 387101    | 77           | 37        | 1       | apolipoprotein A-II [Mus musculus]                                   |
| HDL      | gi 50017     | 84           | 44        | 1       | apolipoprotein A-II [Mus musculus]                                   |
| HDL      | gi 61402210  | 33           | 11        | 1       | ApoA1 protein [Mus musculus]                                         |
| HDL      | gi 619383    | 29           | 7         | 3       | <b>apolipoprotein D_ apoD [human_ plasma_ Peptide_ 246 aa]</b>       |
| HDL      | gi 6680704   | 28           | 2         | 2       | apolipoprotein C-I precursor [Mus musculus]                          |
| HDL      | gi 6753100   | 24           | 2         | 2       | apolipoprotein C-II precursor [Mus musculus]                         |
| HDL      | gi 74146260  | 22           | 4         | 4       | unnamed protein product [Mus musculus]                               |
| HDL      | gi 8850219   | 6            | 2         | 2       | haptoglobin precursor [Mus musculus]                                 |
| LDL      | gi 148683476 | 3            | 2         | 2       | fibrinogen_ alpha polypeptide_ isoform CRA_a [Mus musculus]          |
| LDL      | gi 157951676 | 76           | 10        | 10      | apolipoprotein A-II precursor [Mus musculus]                         |
| LDL      | gi 163644329 | 25           | 9         | 6       | apolipoprotein E precursor [Mus musculus]                            |
| LDL      | gi 17016967  | 0            | 2         | 2       | <b>NUANCE [Homo sapiens]</b>                                         |
| LDL      | gi 199086    | 3            | 7         | 7       | alpha-2-macroglobulin [Mus musculus]                                 |
| LDL      | gi 342350764 | 13           | 3         | 1       | <b>Chain A_ Nmr Structure Of Full Length Apoe3</b>                   |
| LDL      | gi 6680704   | 28           | 3         | 3       | apolipoprotein C-I precursor [Mus musculus]                          |

**Supplementary Table 3. Human and mouse proteins identified in lipoprotein fractions by mass spectrometry.** HDL and LDL fractions were obtained from size-exclusion chromatography of plasma from a FH chimeric mouse. The peak fraction were delipidated, digested with trypsin, and subjected to proteomics by LC-MS. Proteins were identified based on a minimum of two different peptides matching an accession number for the respective human or mouse protein. The “Unique” column indicates the number of peptides for a given protein that is specific to either the mouse or human sequence respectively. Human proteins identified are indicated in bold.

## Supplementary References

1. Bertolini S, *et al.* Clinical expression of familial hypercholesterolemia in clusters of mutations of the LDL receptor gene that cause a receptor-defective or receptor-negative phenotype. *Arterioscler Thromb Vasc Biol* **20**, E41-52 (2000).
2. Amsellem S, *et al.* Intronic mutations outside of Alu-repeat-rich domains of the LDL receptor gene are a cause of familial hypercholesterolemia. *Hum Genet* **111**, 501-510 (2002).
3. Dedoussis GV, *et al.* Molecular characterization of familial hypercholesterolemia in German and Greek patients. *Human mutation* **23**, 285-286 (2004).
4. Sozen MM, *et al.* The molecular basis of familial hypercholesterolaemia in Turkish patients. *Atherosclerosis* **180**, 63-71 (2005).
5. Loux N, *et al.* Screening for new mutations in the LDL receptor gene in seven French familial hypercholesterolemia families by the single strand conformation polymorphism method. *Human mutation* **1**, 325-332 (1992).
6. Mozas P, *et al.* Molecular characterization of familial hypercholesterolemia in Spain: identification of 39 novel and 77 recurrent mutations in LDLR. *Human mutation* **24**, 187 (2004).
7. Robles-Osorio L, *et al.* Genetic heterogeneity of autosomal dominant hypercholesterolemia in Mexico. *Arch Med Res* **37**, 102-108 (2006).

8. Couture P, *et al.* Identification of three mutations in the low-density lipoprotein receptor gene causing familial hypercholesterolemia among French Canadians. *Human mutation Suppl 1*, S226-231 (1998).
9. Tatishcheva Iu A, Mandel'shtam M, Golubkov VI, Lipovetskii BM, Gaitskhoki VS. [Four new mutations and polymorphic variants of the low density lipoprotein receptor in patients with familial hypercholesterolemia in Saint Petersburg]. *Genetika* **37**, 1290-1295 (2001).
10. Gao F, Ihn HE, Medina MW, Krauss RM. A common polymorphism in the LDL receptor gene has multiple effects on LDL receptor function. *Hum Mol Genet* **22**, 1424-1431 (2013).
11. Teslovich TM, *et al.* Biological, clinical and population relevance of 95 loci for blood lipids. *Nature* **466**, 707-713 (2010).
12. Boright AP, Connelly PW, Brunt JH, Morgan K, Hegele RA. Association and linkage of LDLR gene variation with variation in plasma low density lipoprotein cholesterol. *J Hum Genet* **43**, 153-159 (1998).
13. Al-Khateeb A, *et al.* Analysis of sequence variations in low-density lipoprotein receptor gene among Malaysian patients with familial hypercholesterolemia. *BMC Med Genet* **12**, 40 (2011).
